# Supplementary material for: Abnormal level of CUL4B-mediated histone H2A ubiquitination causes disruptive HOX gene expression
Source: PubMed Central journal article supplement (PMC6466687; doi:10.1186/s13072-019-0268-7), 2019-04-16

# Supp Figure 1

NT2

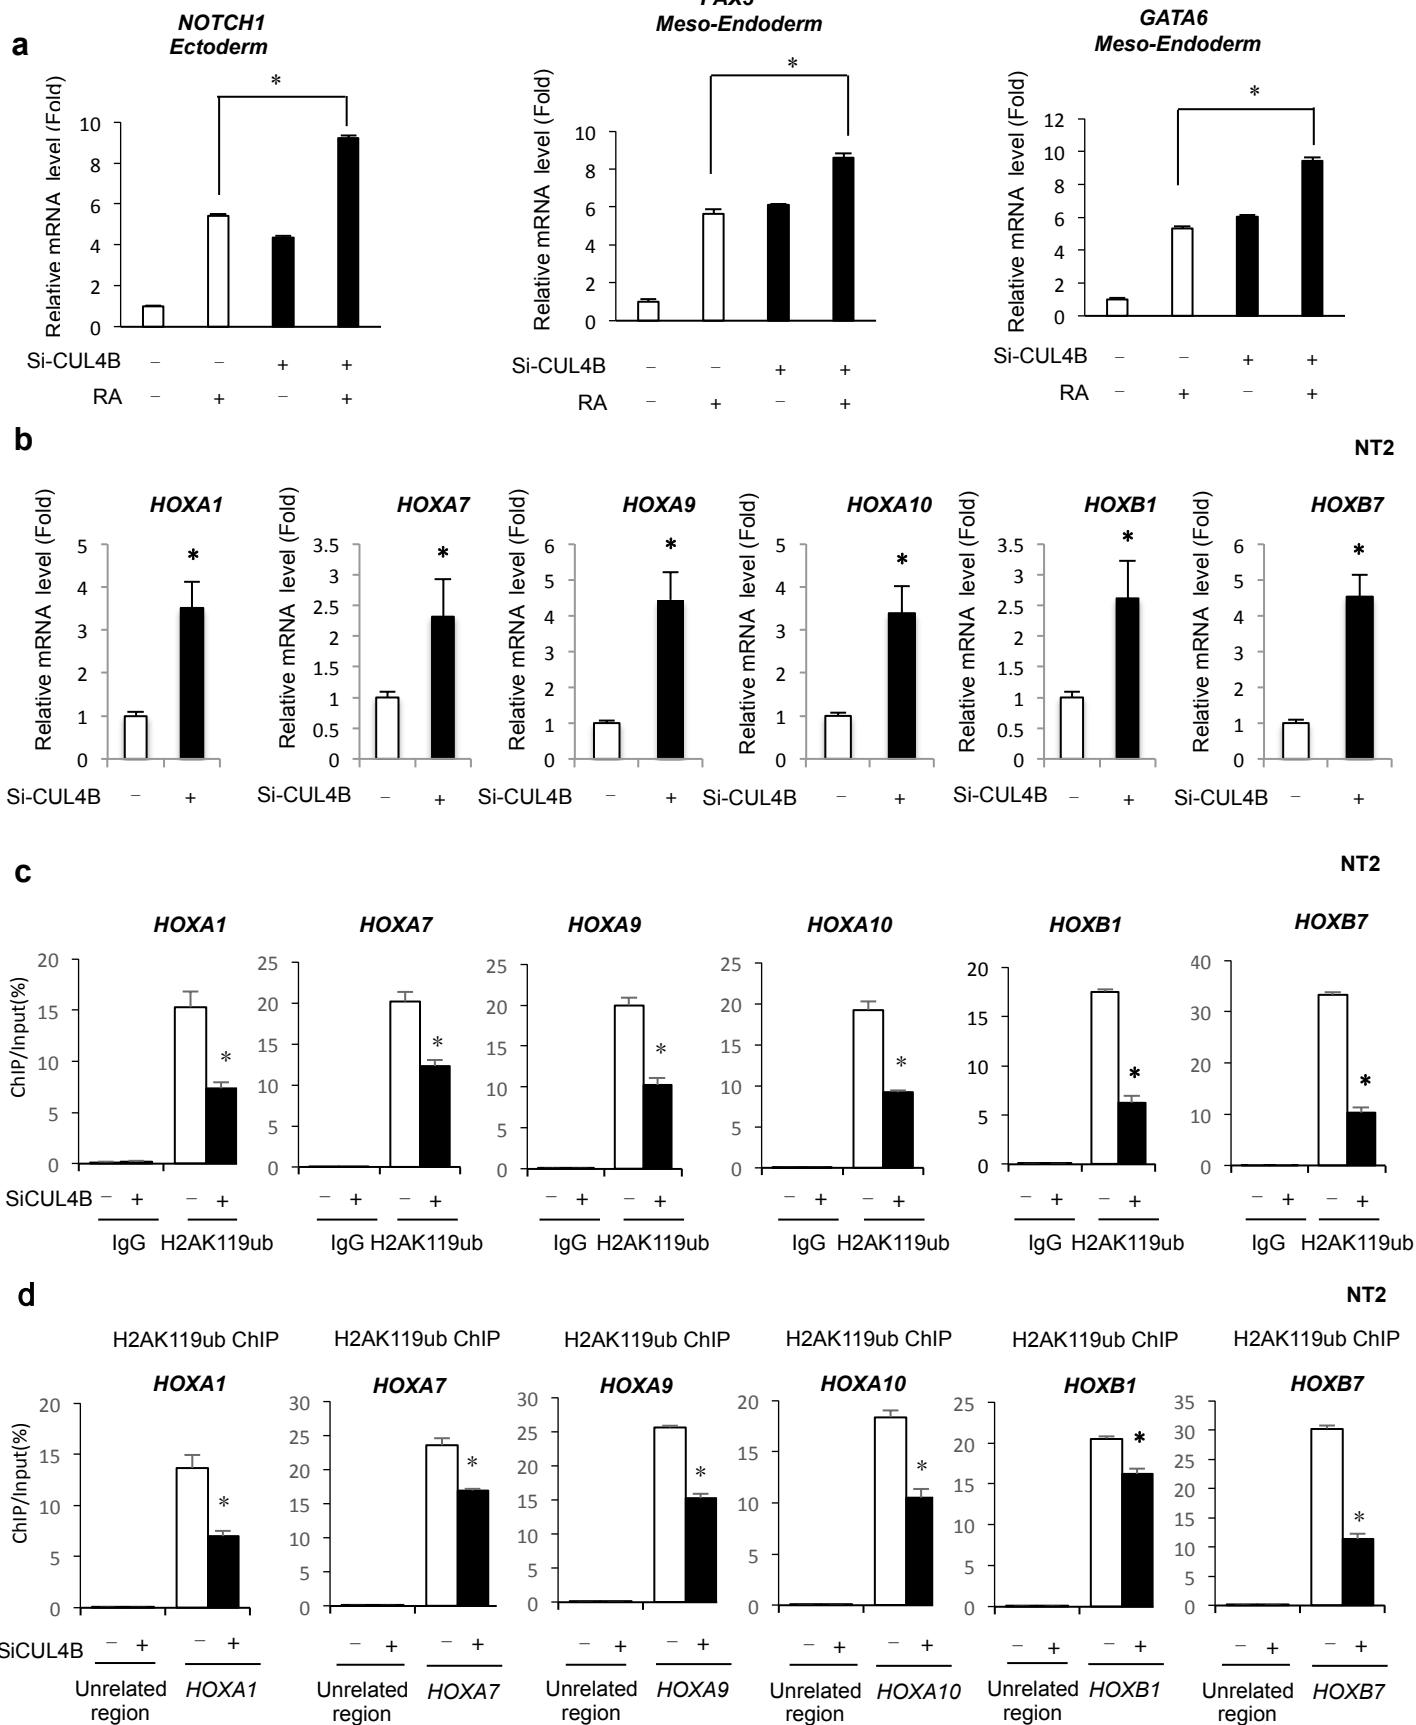

# Supp Figure 2

mESC

**a**

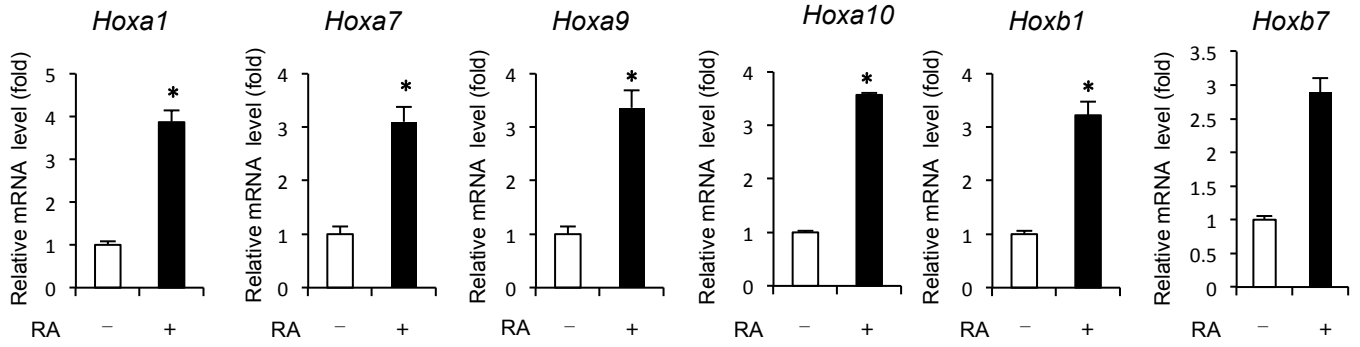

**b**

mESC

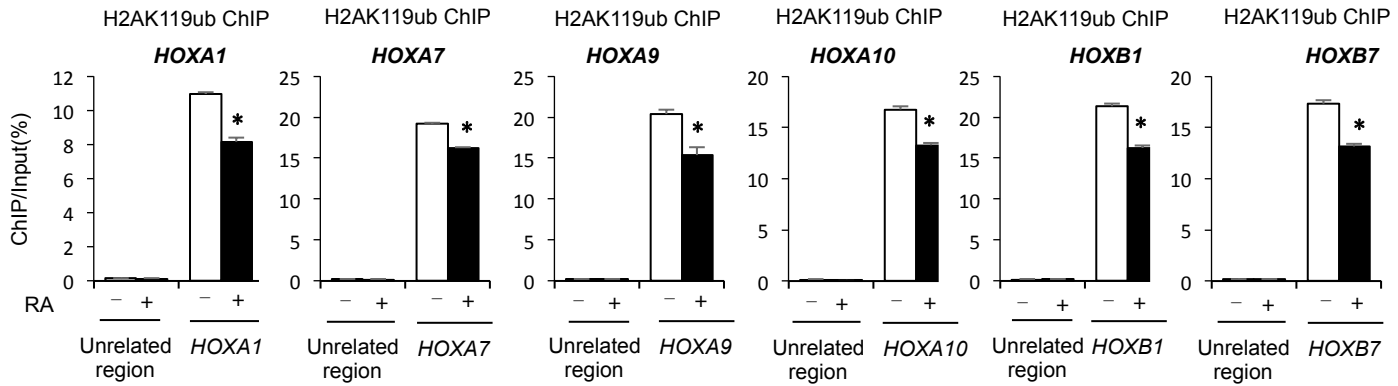

**c**

mESC

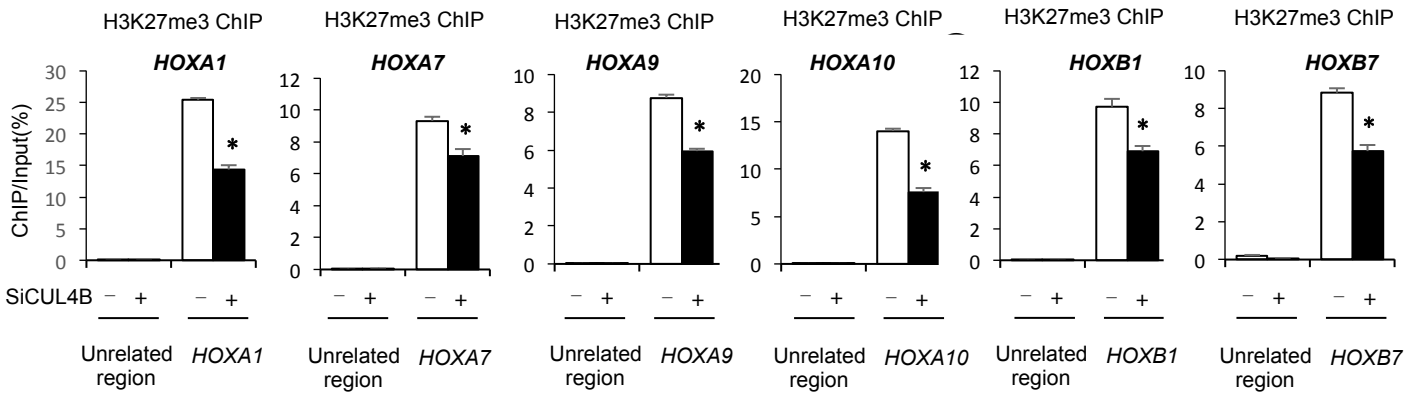

# Supp Figure 3

NT2

**a**

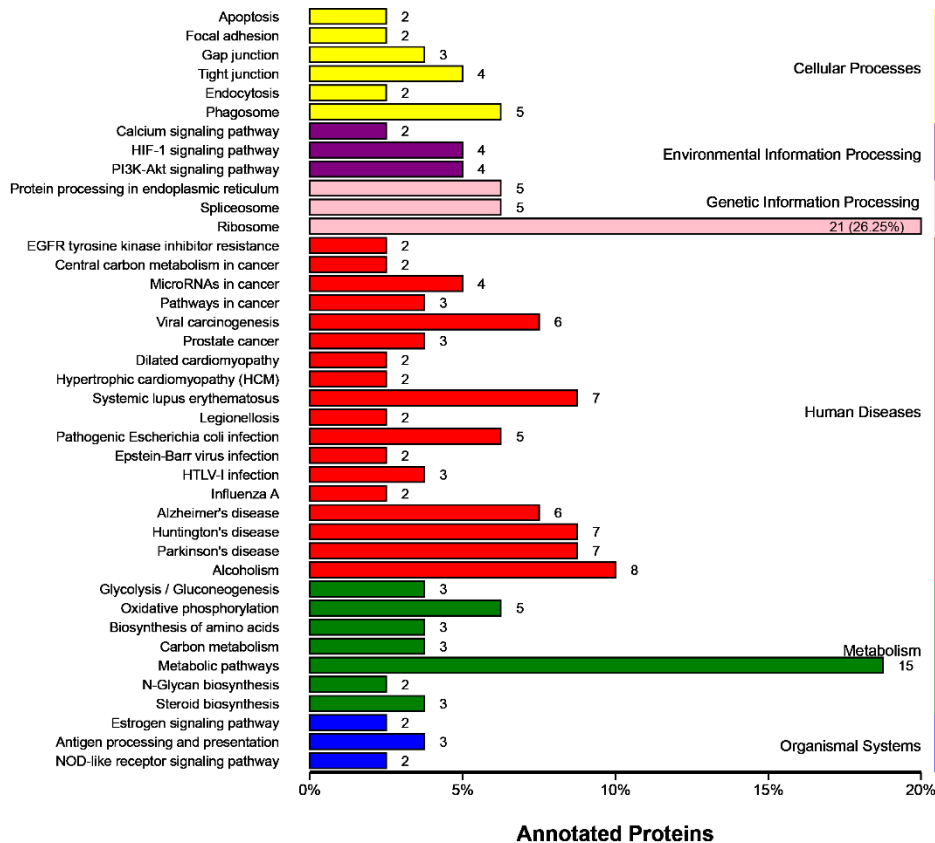

**b**

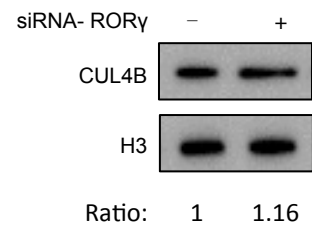

NT2

**c**

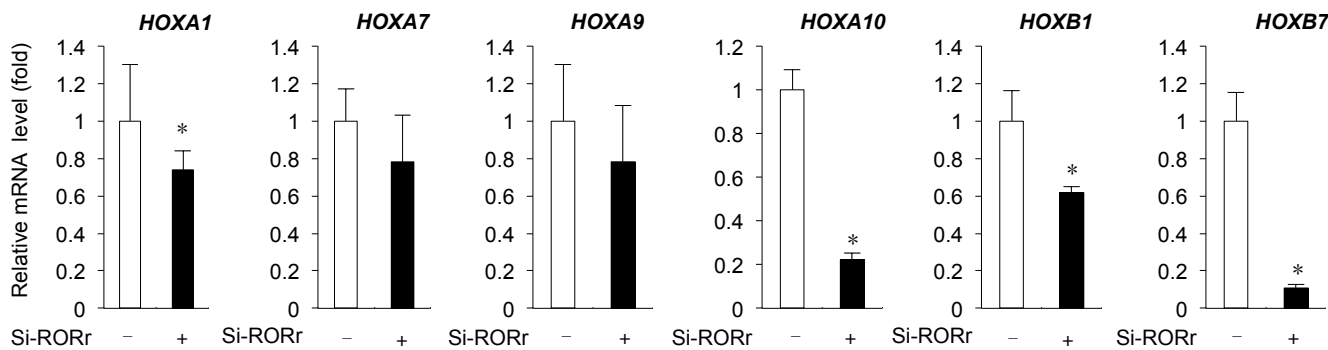

NT2

**d**

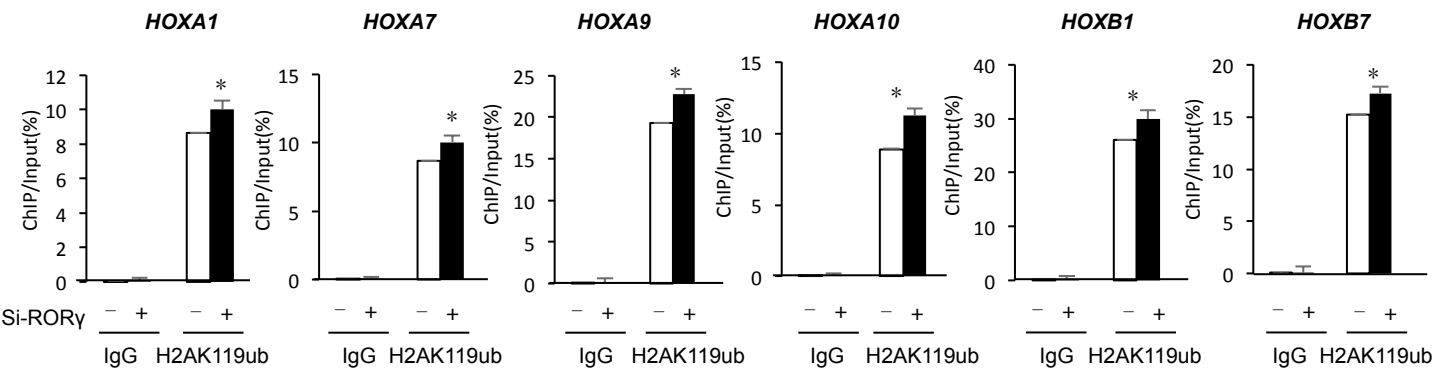

# Supp Figure 4

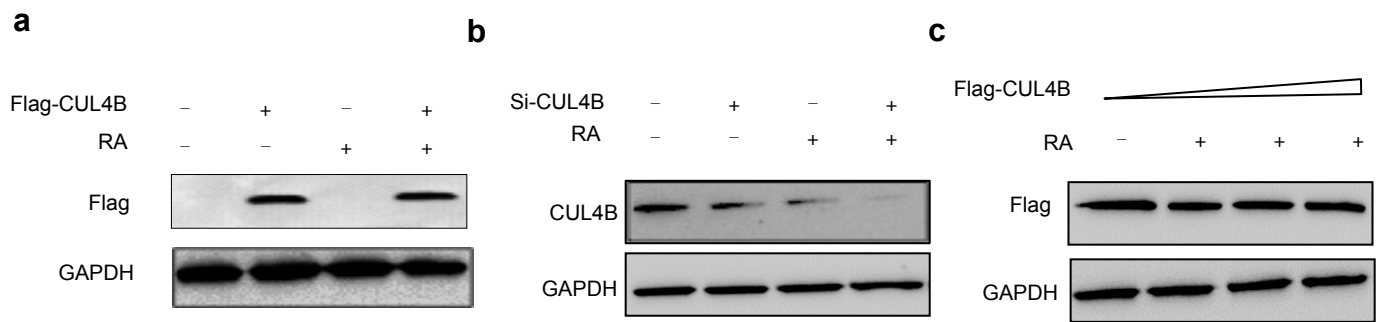

Supplement: 13072_2019_268_MOESM1_ESM.pdf [file 13072_2019_268_MOESM1_ESM.pdf]
